# Supplementary material for: Association of Insulin-Related Serum Factors with Colorectal Polyp Number and Type in Adult Males
Source: Oxford University Press journal article supplement (doi:10.1158/1055-9965.epi-14-0249-t), 2014-06-25
Supplement: 10559965epi140249t-sup-128100_1_supp_2476123_n5www5.docx [file 10559965epi140249t-sup-128100_1_supp_2476123_n5www5.docx]

**Supplementary Table 1**. Association of insulin-related factors with the presence of a hyperplastic polyp relative to no polyp

|  |  | Trend |
| --- | --- | --- |
|  |  | OR |
|  | OR (95% CI) | (p trend) |
| sRAGE (pg/ml) |  |  |
| ≤ 94.45 | 1 |  |
| > 94.45 to ≤ 120.35 | 0.547 (0.176 – 1.699 ) | 0.395 |
| > 120.35 | 0.124 (0.024 – 0.632) | **(0.0085)** |
| VEGF (pg/ml) |  |  |
| ≤ 104.67 | 1 |  |
| > 104.67 to ≤ 184.16 | 4.276 (1.039 – 17.600) | 1.599 |
| > 184.16 | 3.177 (0.723 – 13.963) | (0.1469) |
| C-peptide (ng/ml) |  |  |
| ≤ 1.77 | 1 |  |
| > 1.77 to ≤ 3.31 | 1.416 (0.438 – 4.580) | 1.049 |
| > 3.31 | 1.058 (0.288 – 3.885) | (0.8819) |
| IGF-1 (ng/ml) |  |  |
| ≤ 92.28 | 1 |  |
| > 92.28 to ≤ 124.02 | 0.601 (0.177 –2.048) | 0.760 |
| > 124.02 | 0.582 (0.168 – 2.015) | (0.3913) |
| IGFBP-3 (ng/ml) |  |  |
| ≤ 644.45 | 1 |  |
| > 644.45 to ≤ 720.24 | 0.601 (0.173– 2.088) | 0.825 |
| > 720.24 | 0.685 (0.196 – 2.392) | (0.5510) |
| IGFBP-7 (ng/ml) |  |  |
| ≤ 58.74 | 1 |  |
| > 58.74 to ≤ 73.51 | 3.216 (0.943 – 10.964) | 1.172 |
| > 73.51 | 1.324 (0.339 – 5.171) | (0.6127) |
| IGF-1/IGFBP-3 |  |  |
| ≤ 0.14 | 1 |  |
| > 0.14 to ≤ 0.17 | 0.298 (0.086 – 1.025) | 0.583 |
| > 0.17 | 0.356 (0.102 – 1.240) | (0.0962) |

Note: Model is adjusted for age and ever/never smoked.
